# Supplementary material for: Healthy ageing at work— Efficacy of group interventions on the mental health of nurses aged 45 and older: Results of a randomised, controlled trial
Source: PLoS One. 2018 Jan 19;13(1):e0191000. doi: 10.1371/journal.pone.0191000 (PMC5774702; doi:10.1371/journal.pone.0191000)
Supplement: S1 Table — (XLSX) [file pone.0191000.s005.xlsx]

## Sheet: Tabelle1
VARIABLE	DESCRIPTION	CODING
Code	Identifier	CODE
Group	Group	1=Intervention; 0=Control
sickness absent	sickness absentism in days	number of days
age	age in years	number of years
work experience	years of work experience	number of years
sex	male or female	1=male;2=female
caring for relatives	Reported caregiving for relatives	1=yes; 2=no
mode of employment	Fulltime or parttime	1=fulltime; 2=parttime
t1_wellbeing	score of wellbeing at baseline	Score
t1_TAA	score of TAA at baseline	Score
t1_Irritation	score of Irritation at baseline	Score
t1_irrit_k	score of cognitive Irritation at baseline	Score
t1_irrit_e	score of at baseline	Score
t1_wai2	score of workability at baseline	Score
t1_depress	score of depression at baseline	Score
t1_GAD	score of anxiety at baseline	Score
t1_WHO_QOL_psych_100	score of mental health related Quality of life at baseline	Score
t2_wellbeing	score of wellbeing at follow-up	Score
t2_TAA	score of TAA at follow-up	Score
t2_Irritation	score of Irritation at follow-up	Score
t2_irrit_k	score of cognitive Irritation at follow-up	Score
t2_irrit_e	score of emotional Irritation at follow-up	Score
t2_wai2	score of workability at follow-up	Score
t2_depress	score of depression at follow-up	Score
t2_GAD	score of anxiety at follow-up	Score
t2_WHO_QOL_psych_100	score of mental health related Quality of life at follow-up	Score
